# Supplementary material for: Novel αO-conotoxin GeXIVA[1,2] Nonaddictive Analgesic with Pharmacokinetic Modelling-Based Mechanistic Assessment
Source: MDPI journal article supplement (doi:10.3390/pharmaceutics14091789), 2022-08-26
Supplement: s1 [file s1]

**Table S1.** Summary of mean PWT value of oxaliplatin-induced neuropathic pain rats after IM administered 0.11, 0.22 and 0.44 mg·kg<sup>-1</sup> GeXIVA[1,2]

| Time (h) | Observed PWT value (g)   |                          |                          |
|----------|--------------------------|--------------------------|--------------------------|
|          | 0.11 mg·kg <sup>-1</sup> | 0.22 mg·kg <sup>-1</sup> | 0.44 mg·kg <sup>-1</sup> |
| 0        | 2.58                     | 2.79                     | 2.73                     |
| 1        | 4.66                     | 4.86                     | 6.19                     |
| 2        | 7.08                     | 6.40                     | 12.32                    |
| 4        | 6.63                     | 11.39                    | 14.53                    |
| 6        | 3.84                     | 4.72                     | 8.40                     |

**Table S2** Observed (n= 13 or 14) and model simulated PD effect of intramuscular 0.11, 0.22 and 0.44 mg·kg<sup>-1</sup> GeXIVA[1,2]

| Parameter | 0.44 mg·kg <sup>-1</sup> |       |       | 0.22 mg·kg <sup>-1</sup> |       |       | 0.11 mg·kg <sup>-1</sup> |       |       |
|-----------|--------------------------|-------|-------|--------------------------|-------|-------|--------------------------|-------|-------|
|           | Pred                     | Obs   | Ratio | Pred                     | Obs   | Ratio | Pred                     | Obs   | Ratio |
| Time(h)   |                          |       |       |                          |       |       |                          |       |       |
| 0         | 2.28                     | 2.73  | 1.20  | 2.28                     | 2.79  | 1.22  | 2.28                     | 2.58  | 1.13  |
| 1         | 5.53                     | 6.19  | 1.12  | 5.27                     | 4.86  | 0.92  | 4.87                     | 4.66  | 0.96  |
| 2         | 10.52                    | 12.32 | 1.17  | 9.18                     | 6.40  | 0.70  | 7.47                     | 7.08  | 0.95  |
| 4         | 16.71                    | 14.53 | 0.87  | 10.76                    | 11.39 | 1.06  | 6.88                     | 6.63  | 0.96  |
| 6         | 9.90                     | 8.40  | 0.85  | 6.11                     | 4.72  | 0.77  | 4.17                     | 3.84  | 0.92  |
| AUC (g·h) | 65.77                    | 63.49 | 1.04  | 47.81                    | 43.37 | 1.10  | 35.15                    | 33.68 | 1.04  |

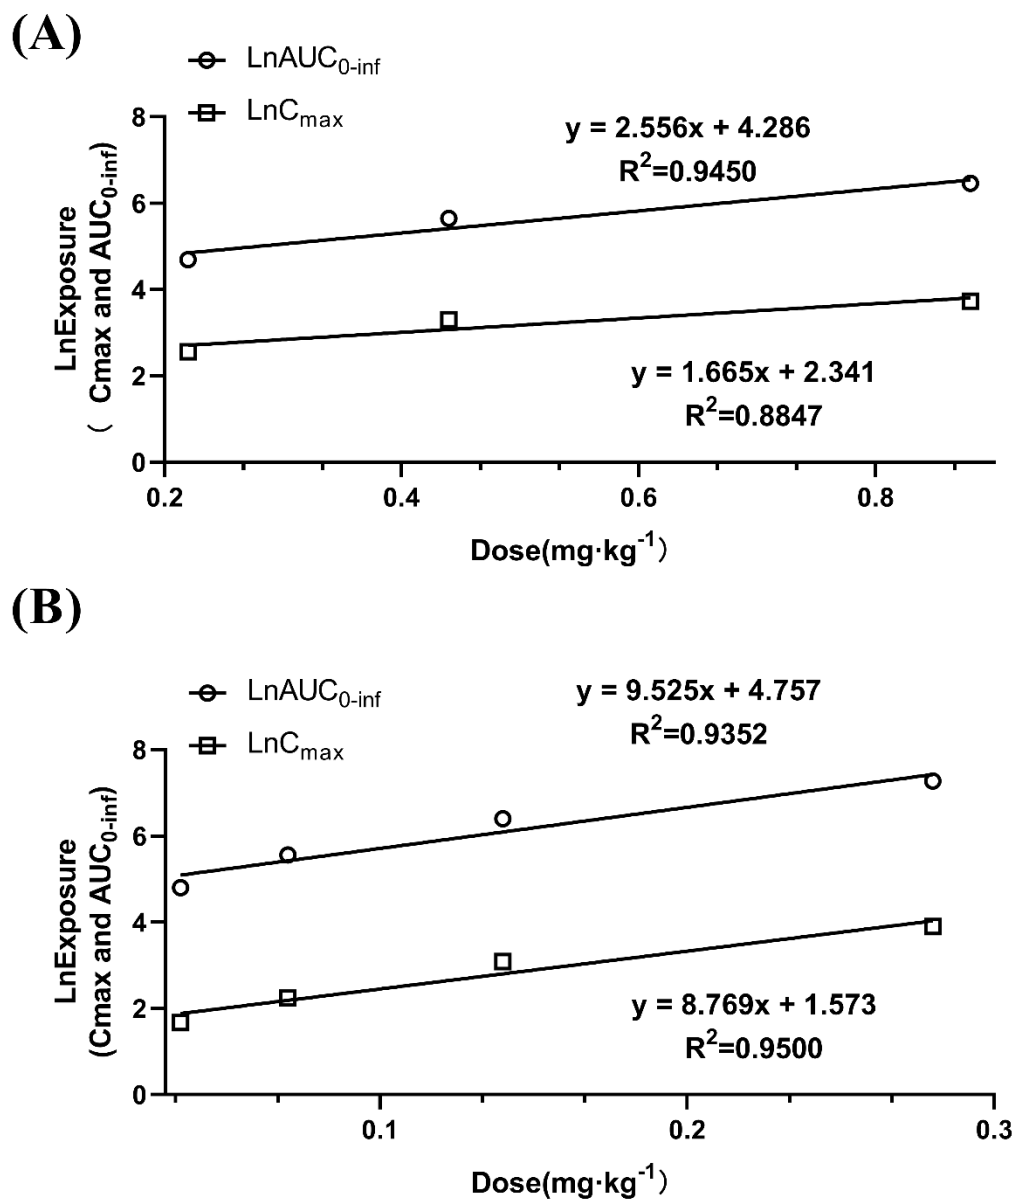

**Figure S1** Linear regression of  $\text{Ln C}_{\text{max}}$  and  $\text{Ln AUC}_{0-\text{inf}}$  versus dose for GeXIVA[1,2].  
 (A) in SD rats after an IM dose of 0.22, 0.44, 0.88  $\text{mg}\cdot\text{kg}^{-1}$ ; (B) in beagle dogs after an IM dose of 0.035, 0.07, 0.14 or 0.28  $\text{mg}\cdot\text{kg}^{-1}$
